# Supplementary material for: A TSPO-related protein localizes to the early secretory pathway in Arabidopsis, but is targeted to mitochondria when expressed in yeast
Source: PubMed Central journal article supplement — J Exp Bot. 2010 Sep 16;62(2):497–508. doi: 10.1093/jxb/erq283 (PMC3003801; doi:10.1093/jxb/erq283), 2010-09-16
Supplement: supp_erq283_00051433-file002.pdf [file supp_erq283_00051433-file002.pdf]

**Supplemental table 1:** Summary of number of transmembrane domains in human TSPO1 and TSPO2, Arabidopsis AtTSPO and Vitis vinifera VvTSPO using different transmembrane (TM) prediction software.

| <b>TM Prediction program</b> | <b>Reference</b>                                                                                             | <b>TSPO1</b> | <b>TSPO2</b> | <b>AtTSPO</b> | <b>VvTSPO</b> |
|------------------------------|--------------------------------------------------------------------------------------------------------------|--------------|--------------|---------------|---------------|
| <b>TMHMM2</b>                | <a href="http://www.cbs.dtu.dk/services/TMHMM">www.cbs.dtu.dk/services/TMHMM</a>                             | 5            | 5            | 2             | 3             |
| <b>HMMTOP2</b>               | <a href="http://www.enzim.hu/hmmtop">www.enzim.hu/hmmtop</a>                                                 | 4            | 5            | 4             | 4             |
| <b>PHOBIUS</b>               | <a href="http://phobius.sbc.su.se">http://phobius.sbc.su.se</a>                                              | 5            | 5            | 4             | 5             |
| <b>DAS</b>                   | <a href="http://www.sbc.su.se/~miklos/DAS/maindas.html">www.sbc.su.se/~miklos/DAS/maindas.html</a>           | 5            | 5            | 4             | 5             |
| <b>SPLIT4</b>                | <a href="http://www.split.pmfst.hr">www.split.pmfst.hr</a>                                                   | 5            | 5            | 3             | 4             |
| <b>TMPred</b>                | <a href="http://www.ch.embnet.org/software/TMPRED_form.html">www.ch.embnet.org/software/TMPRED_form.html</a> | 5            | 5            | 5             | 4             |

**WT**

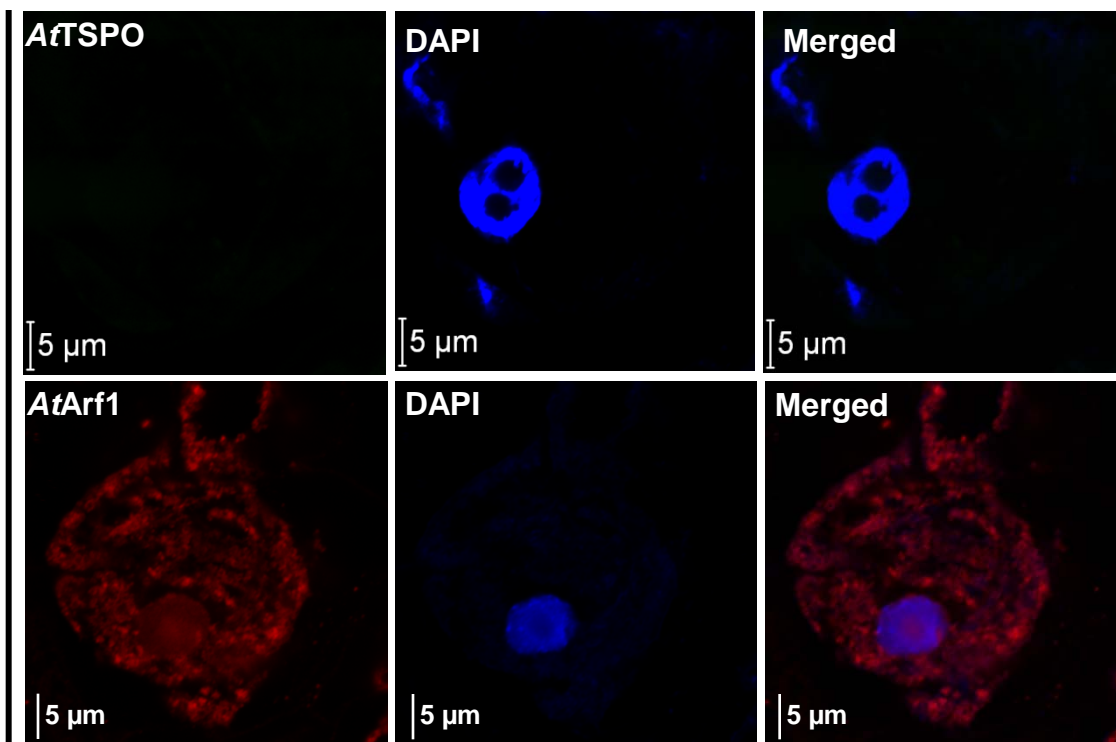

**WT  
+  
ABA**

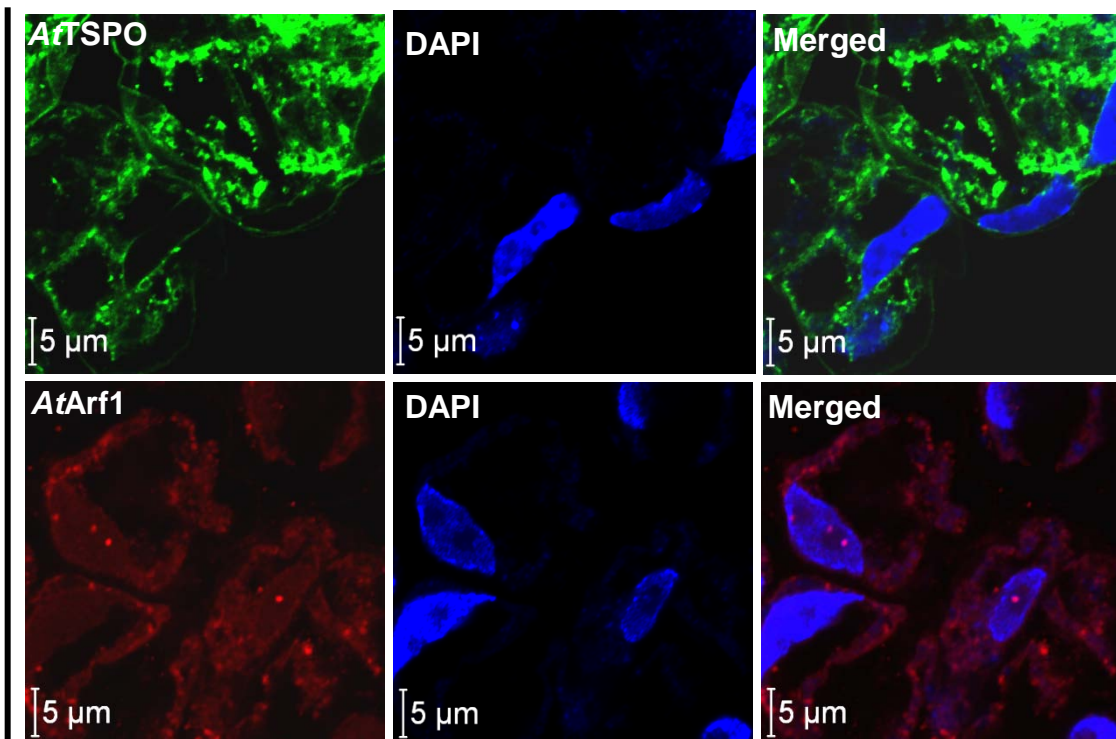

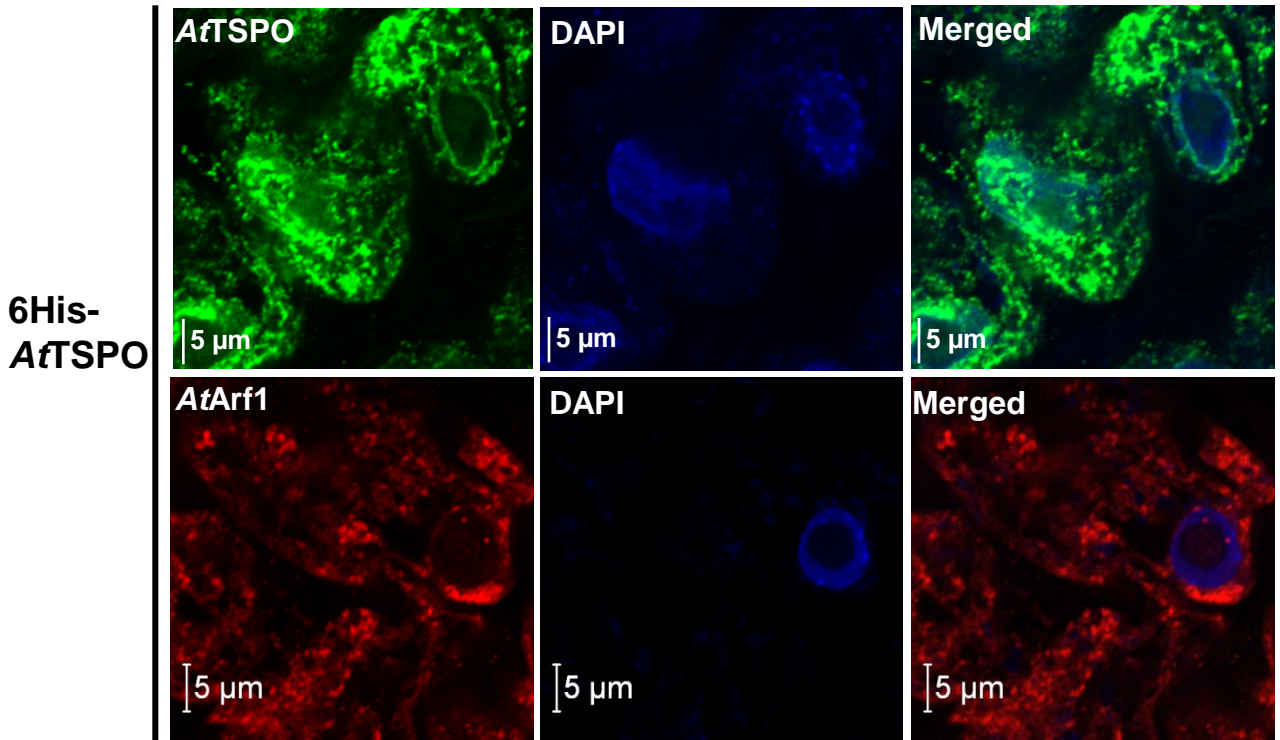

### **SF1: Anti-AtArf1 and anti-AtTSP0 probing of plant cells**

Each antibody was used alone to probe wild type cells (WT), wild type cells pre-incubated with ABA (WT + ABA) or a transgenic cell line overexpressing 6xHis-AtTSP0. Nuclei are highlighted by DAPI staining.

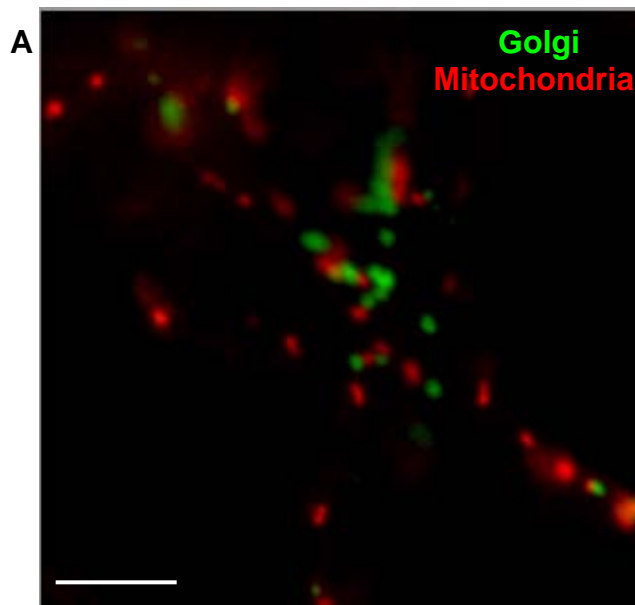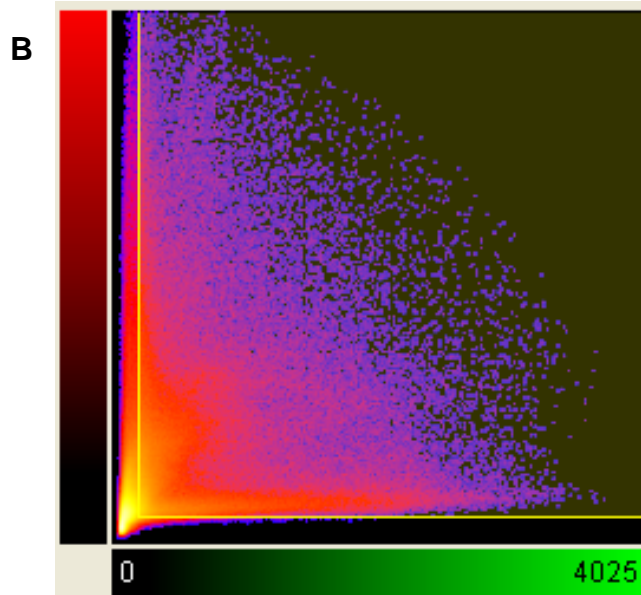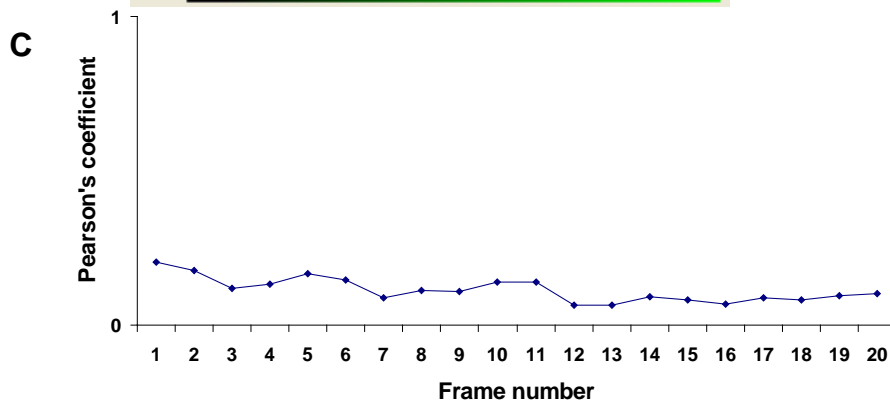

## SF2: YFP-AtTSPO and Mitotracker-labelled mitochondria do not colocalize

A- single frame from the merge movie shown in supplemental data highlighting the Golgi and the mitochondria. B- colocalization analysis with Imaris (12 bits image)  
C- statistical analysis of the colocalization with the Pearson coefficient.

```

HsTSP01 -----MAPPWVPAMGFTLAPSLGC 19
HsTSP02 -----MR---LQGAIFVLLPHLGP 16
AtTSP0  MDSQDIRYRGGDDRDAAATTAMAETERKSADDNKGKRDQKRAMAKRGLKSLTVAVAAPVLV 60
                                         *   : . . . : . :

HsTSP01 FVGSRFVHGEGLRWYAGLQKPSWHPPHWVLGPVWGTLYSAMGYGSYLVWKELGG-FTEEKA 78
HsTSP02 ILVWLFTRDHMSGWCEGPRMLSWCPFYKVLLLVQTAIYSVVGYASYLVWKDLGGGLGWPL 76
AtTSP0  TLFATYFLGTSDGYGNRAKSSSWIPPLWLLHTTCLASSGLMGLAAWLVWVDGGF---HKK 117
      :   : .   :   : ** *   :* .   : . : * . : : * * * : *

HsTSP01 VVPLGLYTGQLALNWAWPPIFFGARQMGWALVDLLLVSGAAAAATTVAWYQVSPLAARLLLY 138
HsTSP02 ALPLGLYAVQLTISWTVLVLFFTVHNPGLALLHLLLLYGLVVSTALIWHPINKLAALLLL 136
AtTSP0  PNALYLYLAQFLLCLVWDPVTFRVGSGVAGLAVWLGQSAALFGCYKAFNEISPVAGNLVK 177
      . * ** * : : .   : * . .   . * * . .   : : . : * . * :

HsTSP01 PYLAWLAFTTTTLNYCVWRDNHGWRGGRRLPE--- 169
HsTSP02 PYLAWLTVTSALTYHLWRDSLCPVHQPQPTEKSD 170
AtTSP0  PCLAWAAFVAAVNVKLAVA----- 196
* *** : . . : : . :

```

### SF3:

CLUSTALW alignment of Arabidopsis *AtTSP0* (accession #AAL16286), human *HsTSP01* (accession # NP\_000705) and *HsTSP02* (accession # NP\_001010873) TspO/MBR domain (IPR004307)-containing membrane proteins. *HsTSP01* is targeted to the mitochondrial outer membrane in mammalian and yeast cells, while *HsTSP02* is targeted to the endoplasmic reticulum in animal cells. Underlined is the Schelman motif (Rone et al., 2009) important for *HsTSP01* import into the mitochondrial outer membrane. Conserved residues are marked in bold, negatively charged residues in red, positively charged residues in green and the predicted transmembrane segments in *HsTSP01* are shaded in grey.

A

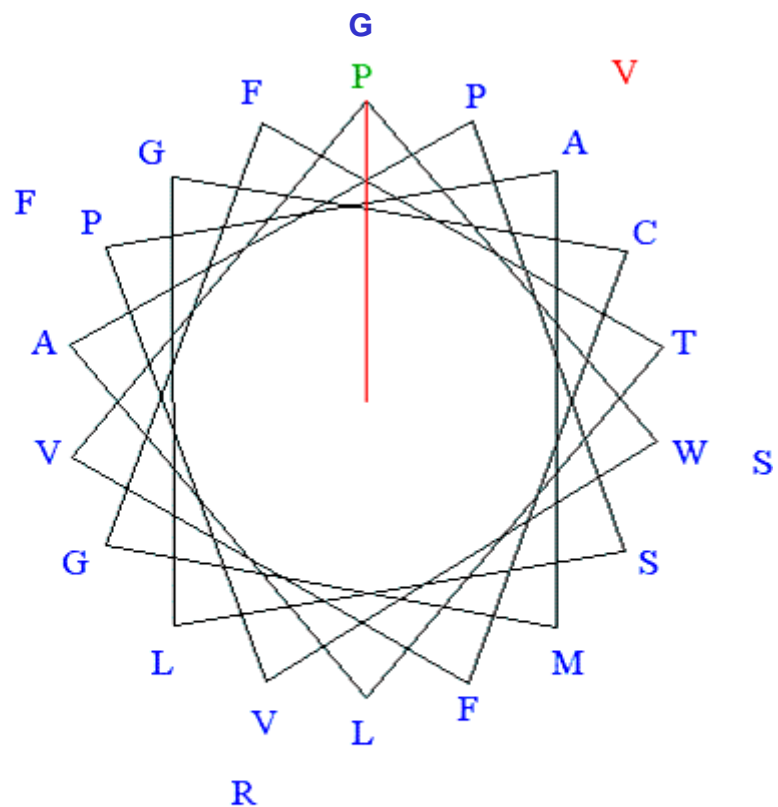

TMS 1: PWVPAMGFTLAPSLGCFVGSRFV

Rotational angle: 330.74

Selected Scale: Pi

**Predicted  $\Delta G_{app} = 2.672$**

**B**

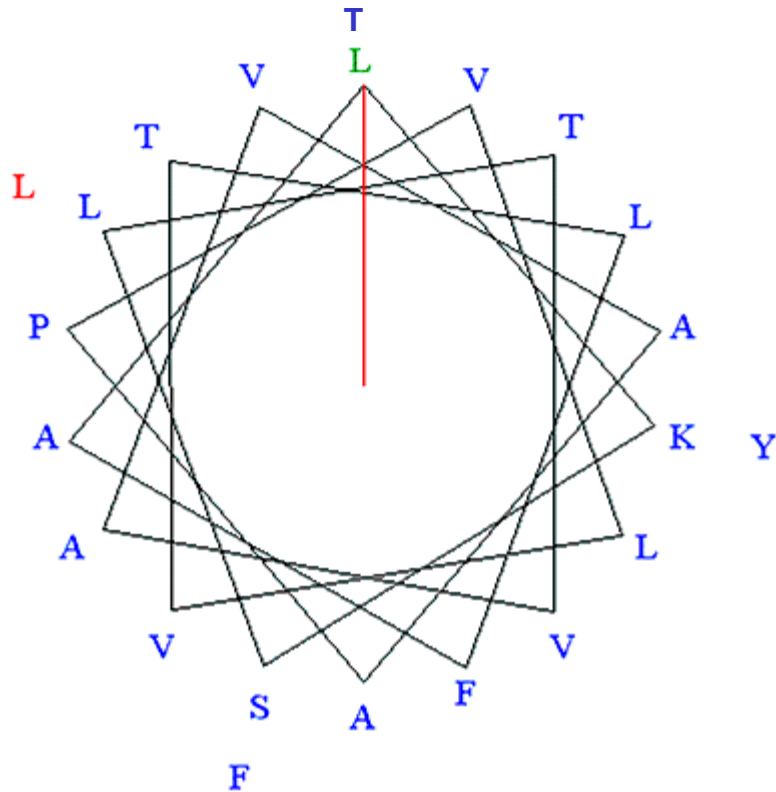

TMS 1: LKSLTVAVAAPVLVTLFATYFL

Rotational angle: 12.6

Selected Scale: Pi

Predicted  $\Delta G_{app} = -0.660$

**SF4:**  $\alpha$ -Helical wheel projection of human TSPO1 (A) and *Af*TSPO (B) predicted first transmembrane segment sequences. The first residues are in green and the last residues in red. The prediction of the corresponding apparent free energy difference,  $\Delta G_{app}$ , for insertion of each TM sequence into the endoplasmic reticulum membrane by means of the Sec61 translocon was calculated using the  $\Delta G$  prediction server v1.0 at <http://dgpred.cbr.su.se/index.php?p=home>.
